# Supplementary material
Source: PubMed Central journal article supplement (PMC2727182)

**Web Table 1.** Summary of Cluster Analysis of Breast Cancer Survival Among Women With Breast Cancer Aged 66 Years or Older Diagnosed in 1992–1999 in 5 SEER Registries

| <b>Metropolitan Area</b> | <b>Zone</b>    | <b>No. of<br/>Observed<br/>Cases</b> | <b>No. of<br/>Expected<br/>Cases</b> | <b>Observed/<br/>Expected<sup>a</sup></b> | <b>No. of<br/>Census<br/>Tracts</b> | <b>P Value</b> |
|--------------------------|----------------|--------------------------------------|--------------------------------------|-------------------------------------------|-------------------------------------|----------------|
| Detroit                  | 1 <sup>b</sup> | 223                                  | 139.6                                | 1.60                                      | 261                                 | 0.001          |
| Detroit                  | 2              | 30                                   | 66.9                                 | 0.45                                      | 61                                  | 0.056          |
| Atlanta                  | 1 <sup>b</sup> | 104                                  | 57.5                                 | 1.81                                      | 95                                  | 0.001          |
| Atlanta                  | 2              | 110                                  | 152.1                                | 0.72                                      | 135                                 | 0.026          |
| Seattle-Puget Sound      | 1 <sup>b</sup> | 14                                   | 2.8                                  | 4.94                                      | 9                                   | 0.118          |
| San Francisco/Oakland    | 1 <sup>b</sup> | 0                                    | 7.7                                  | 0.00                                      | 9                                   | 0.805          |
| Connecticut              | 1 <sup>b</sup> | 0                                    | 8.7                                  | 0.00                                      | 8                                   | 0.605          |

<sup>a</sup> Observed/Expected greater than one denotes increased risk of shorter-than-expected survival.

<sup>b</sup> Most likely cluster based on Satscan results.

**Web Figure 1.** Breast cancer cluster of shorter-than-expected survival (cluster 1), longer-than-expected survival (cluster 2), and outside cluster areas with census-tract poverty rate for women with breast cancer age 66 or older diagnosed in 1992-1999, Detroit, MI.

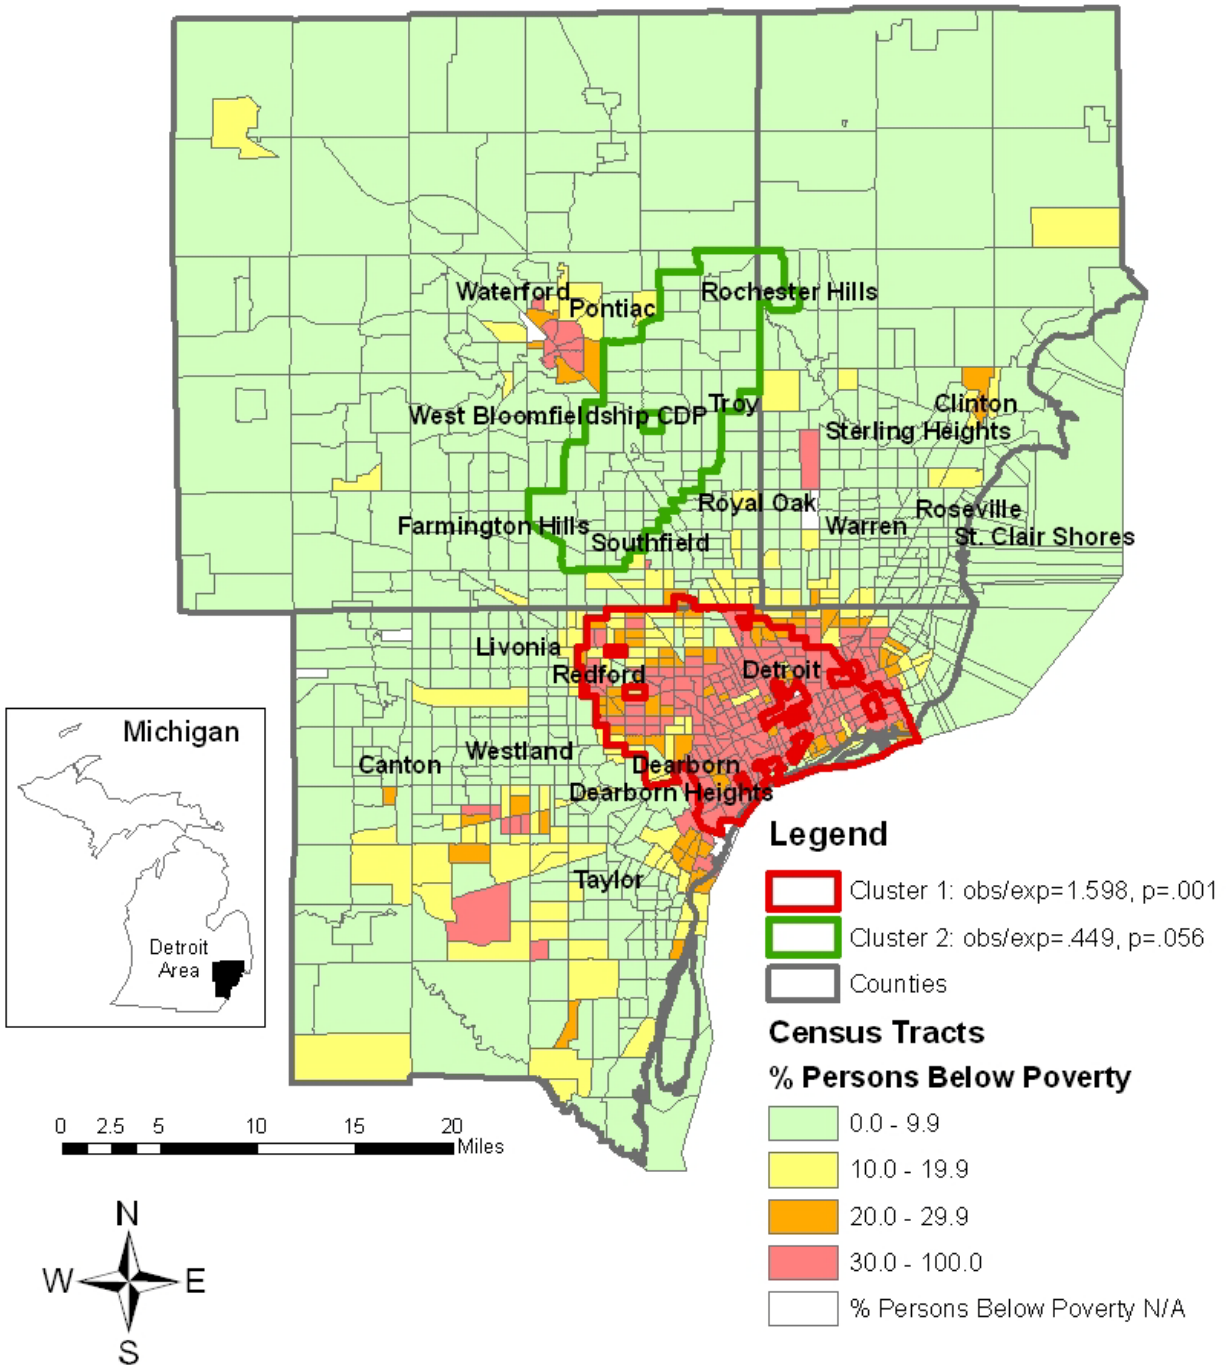

**Web Figure 2.** Breast cancer cluster of shorter-than-expected survival (cluster 1), longer-than-expected survival (cluster 2), and outside cluster areas with census-tract African Americans for women with breast cancer age 66 or older diagnosed in 1992-1999, Detroit, MI.

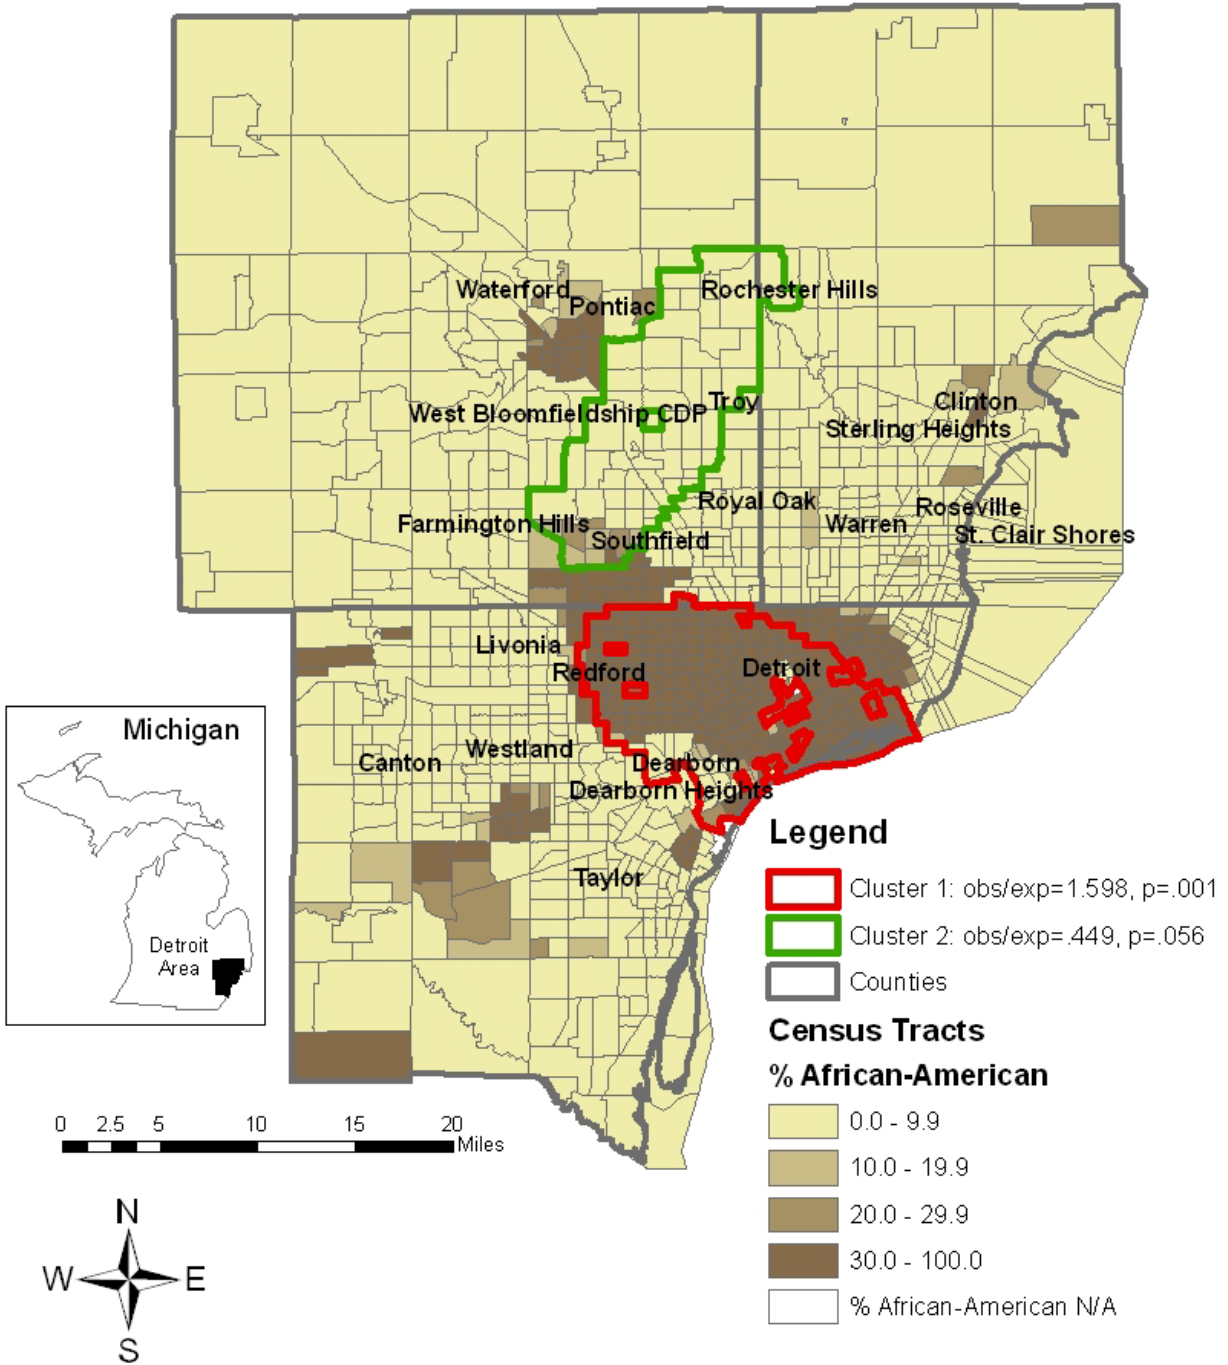

**Web Figure 3.** Breast cancer cluster of shorter-than-expected survival (cluster 1), longer-than-expected survival (cluster 2), and outside cluster areas with census-tract poverty rate for women with breast cancer age 66 or older diagnosed in 1992-1999, Atlanta, GA.

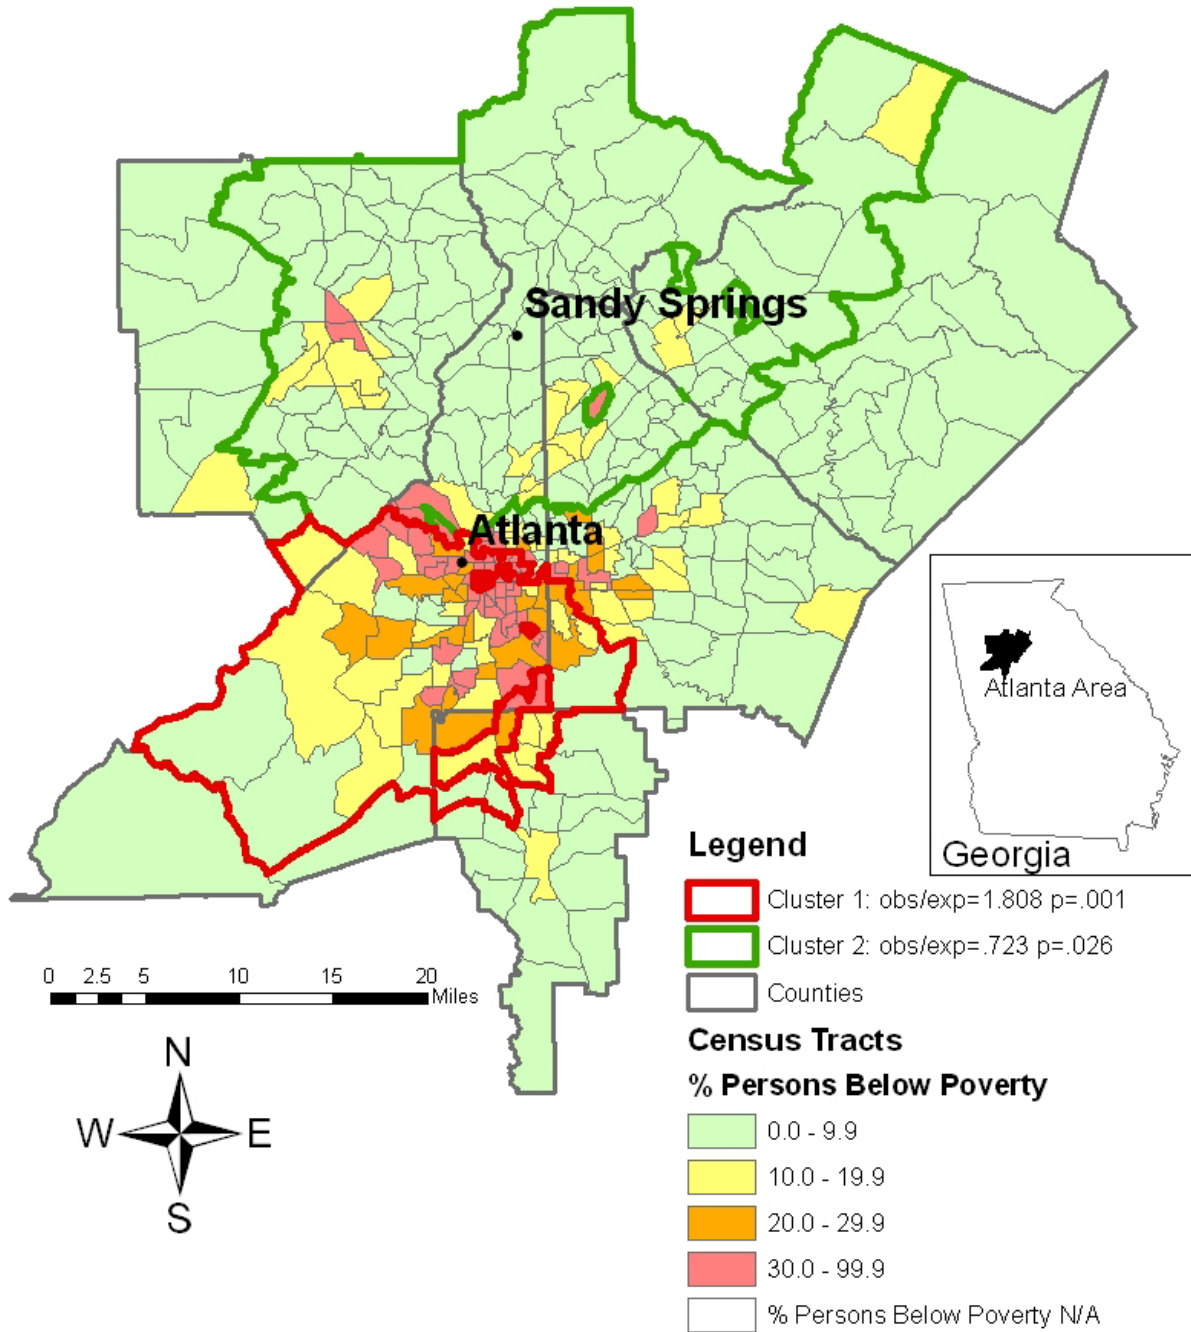

**Web Figure 4.** Breast cancer cluster of shorter-than-expected survival (cluster 1), longer-than-expected survival (cluster 2), and outside cluster areas with census-tract percent African American for women with breast cancer age 66 or older diagnosed in 1992-1999, Atlanta, GA

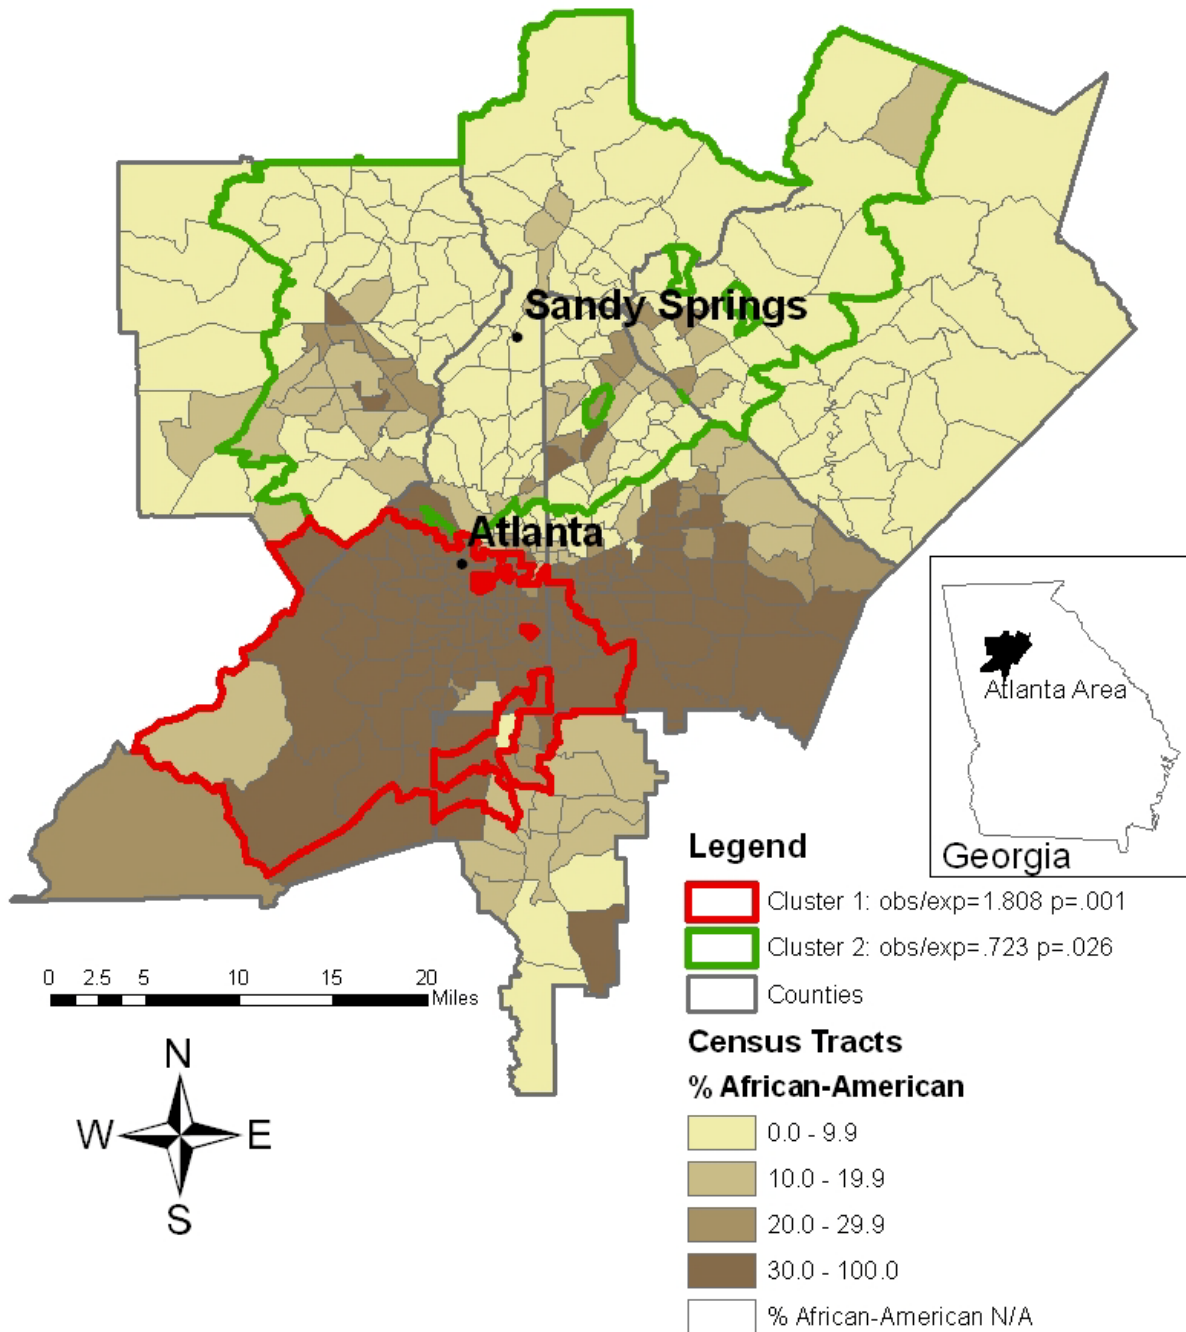

Web Figure 5. San Francisco/Oakland, CA, area with census-tract poverty rate.

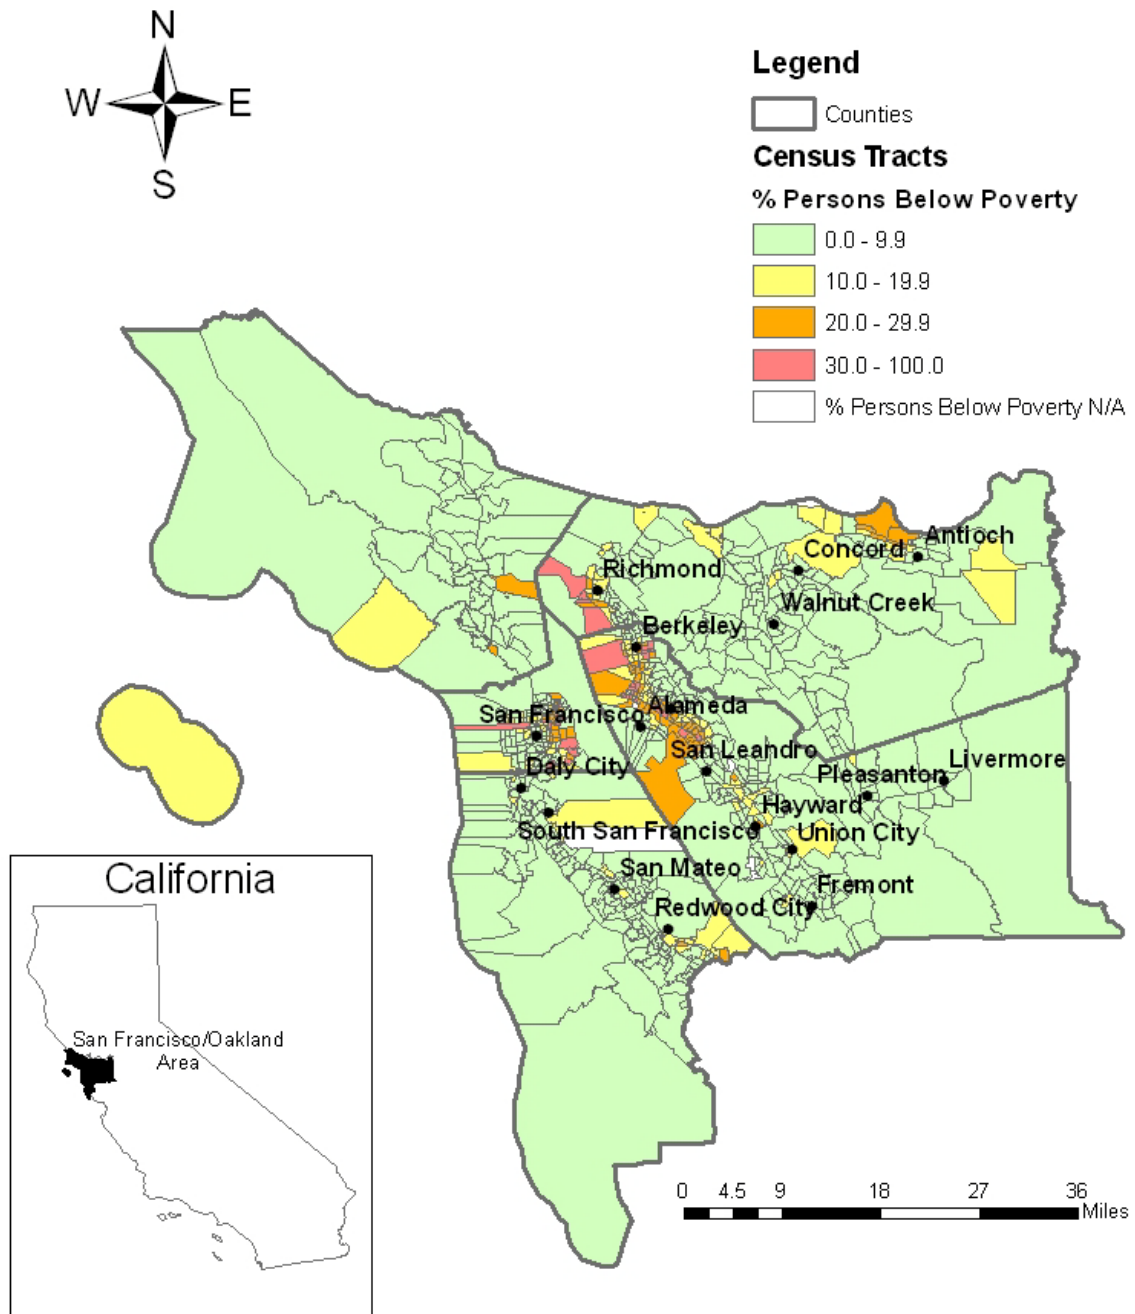

**Web Figure 6.** San Francisco/Oakland, CA, area with census-tract percent African American.

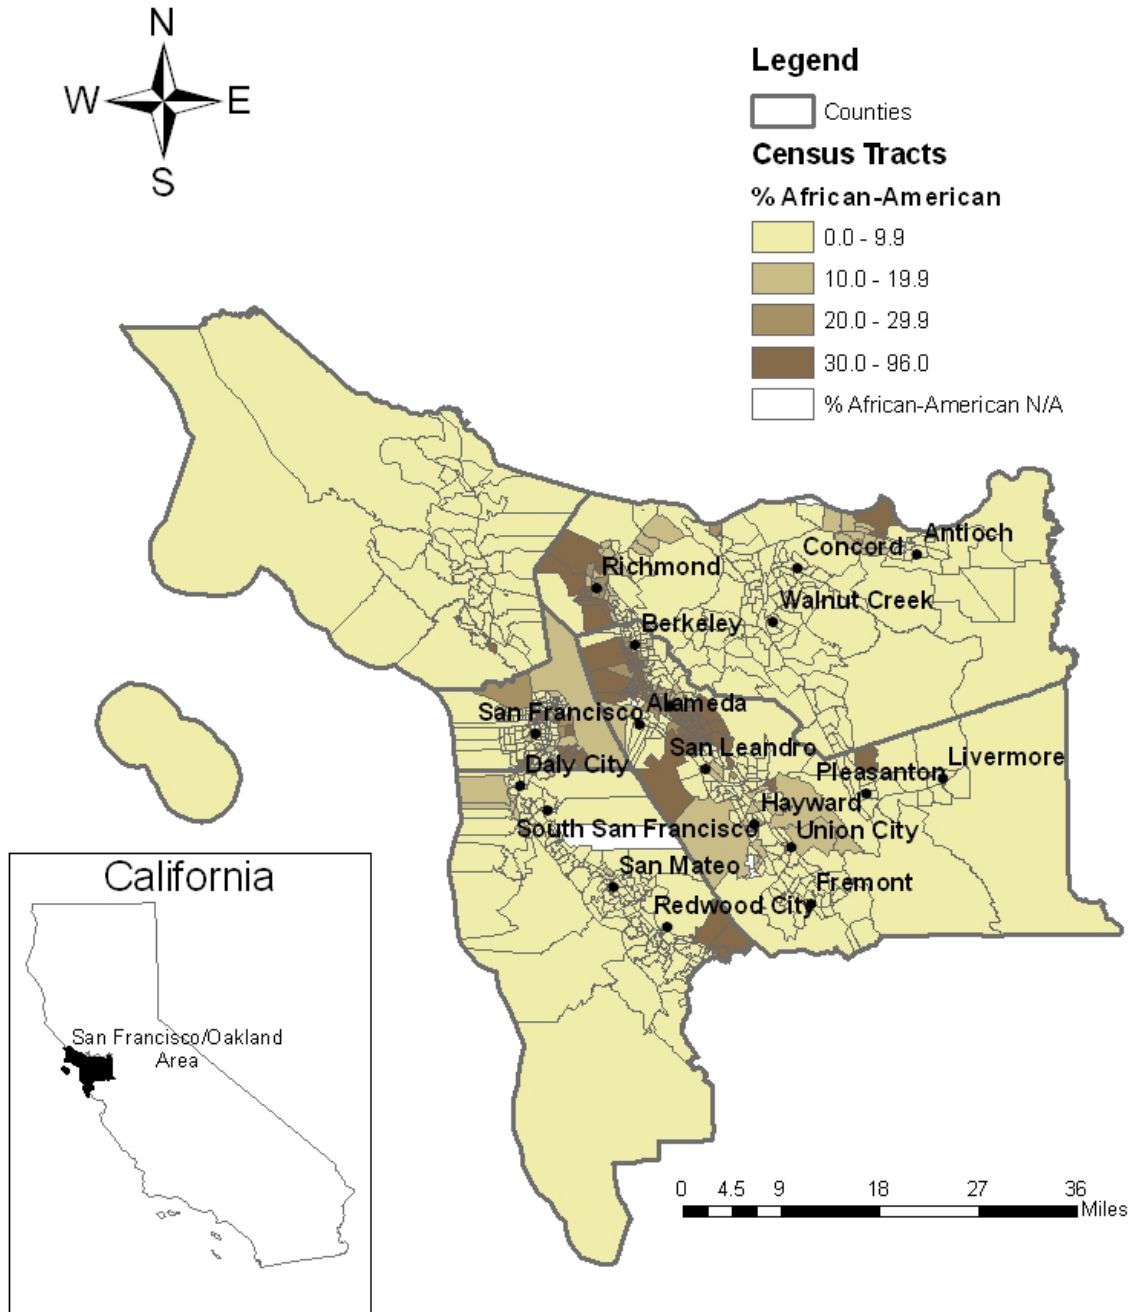



Web Figure 7. State of Connecticut with census-tract percent poverty rate.

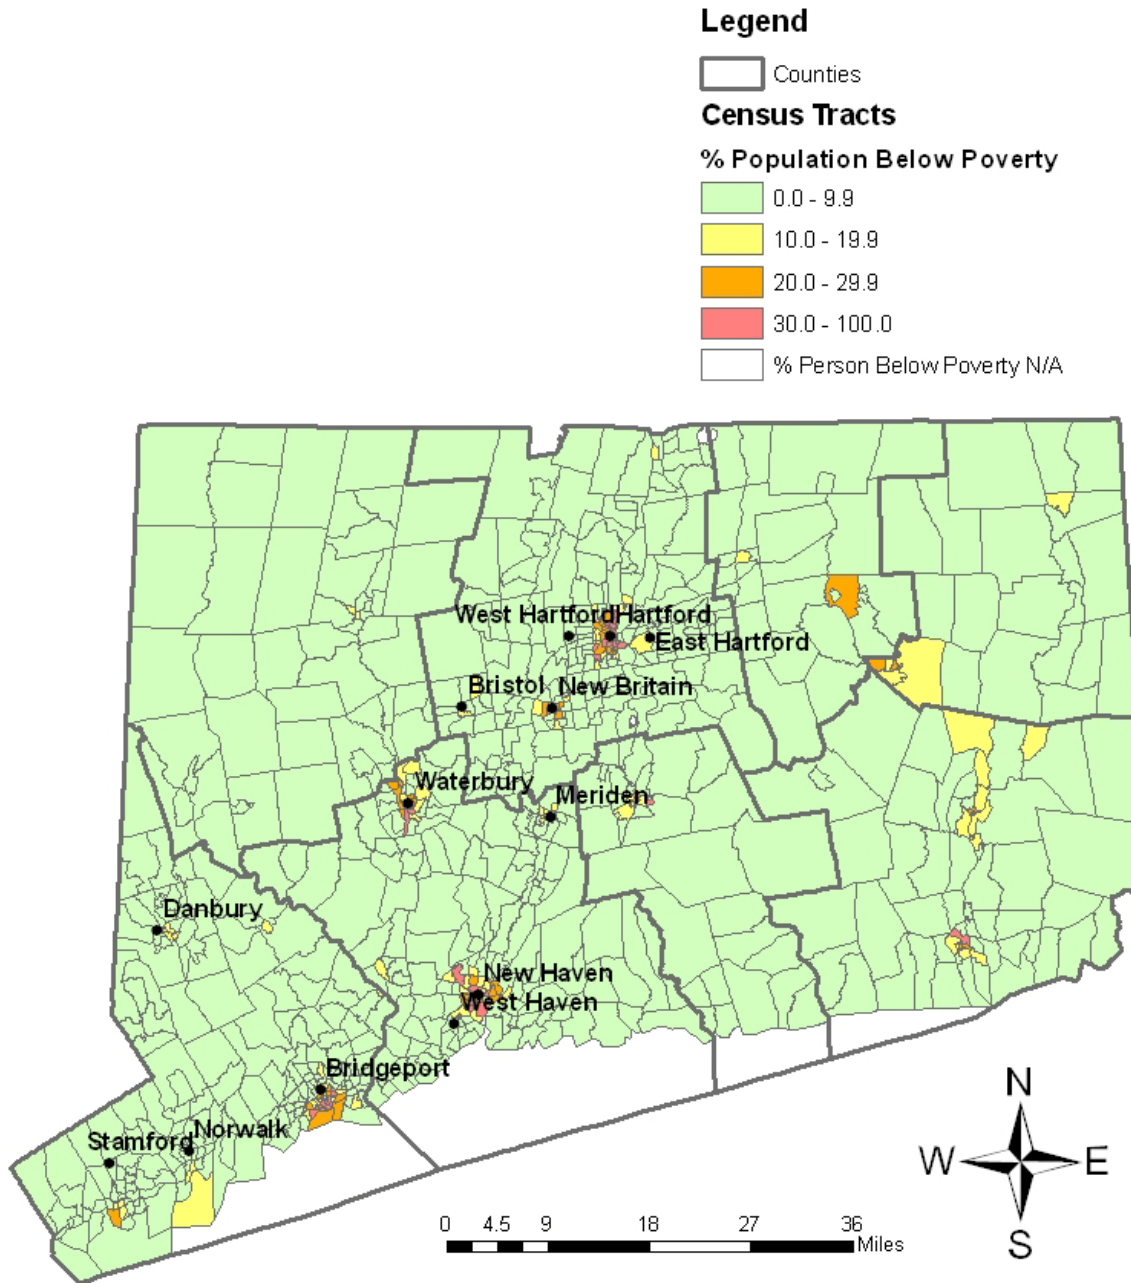



**Web Figure 8.** State of Connecticut with census-tract percent African Americans.

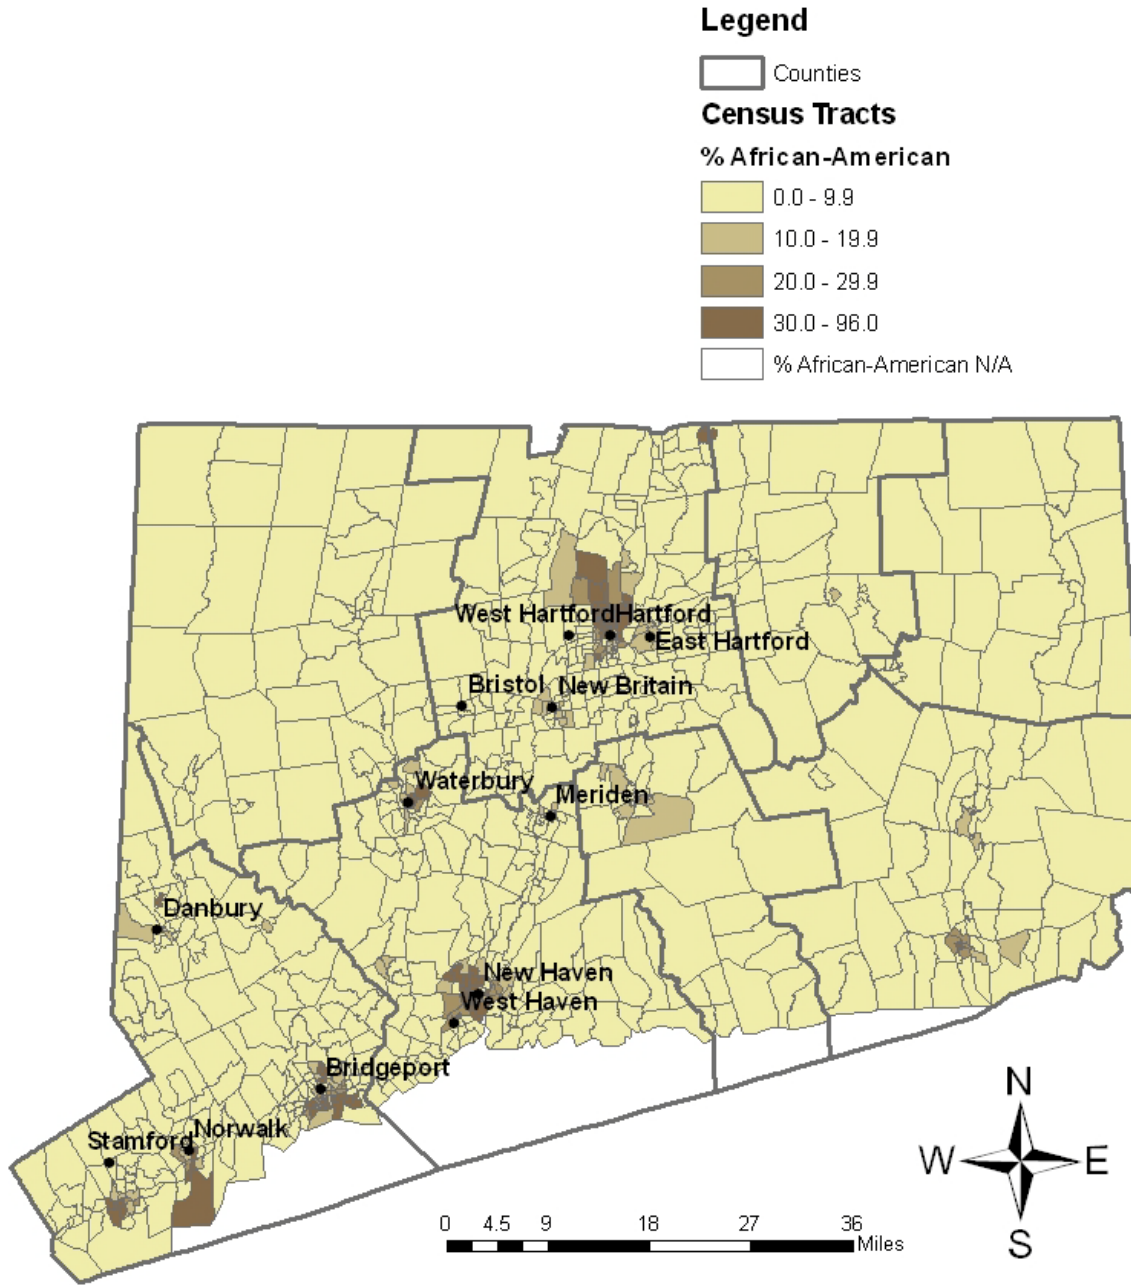

Web Figure 9. Seattle/Puget Sound area, WA, with census-tract poverty rate.

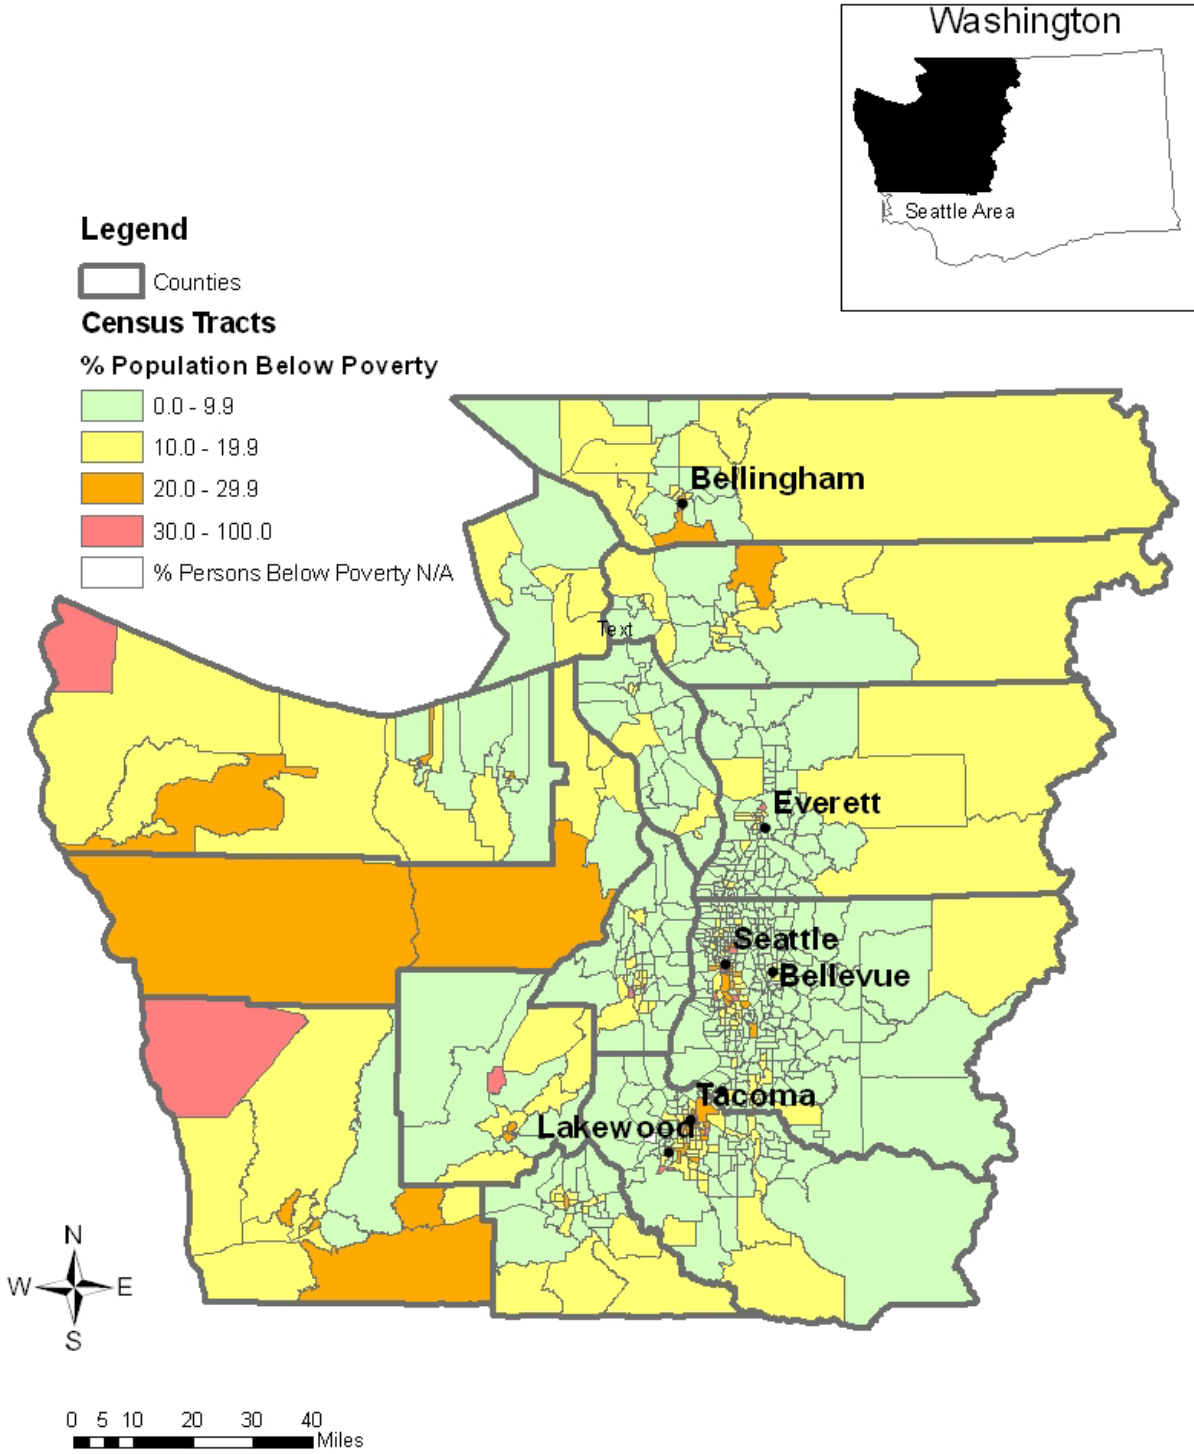

**Web Figure 10.** Seattle/Puget Sound area, WA, with census-tract percent African American.

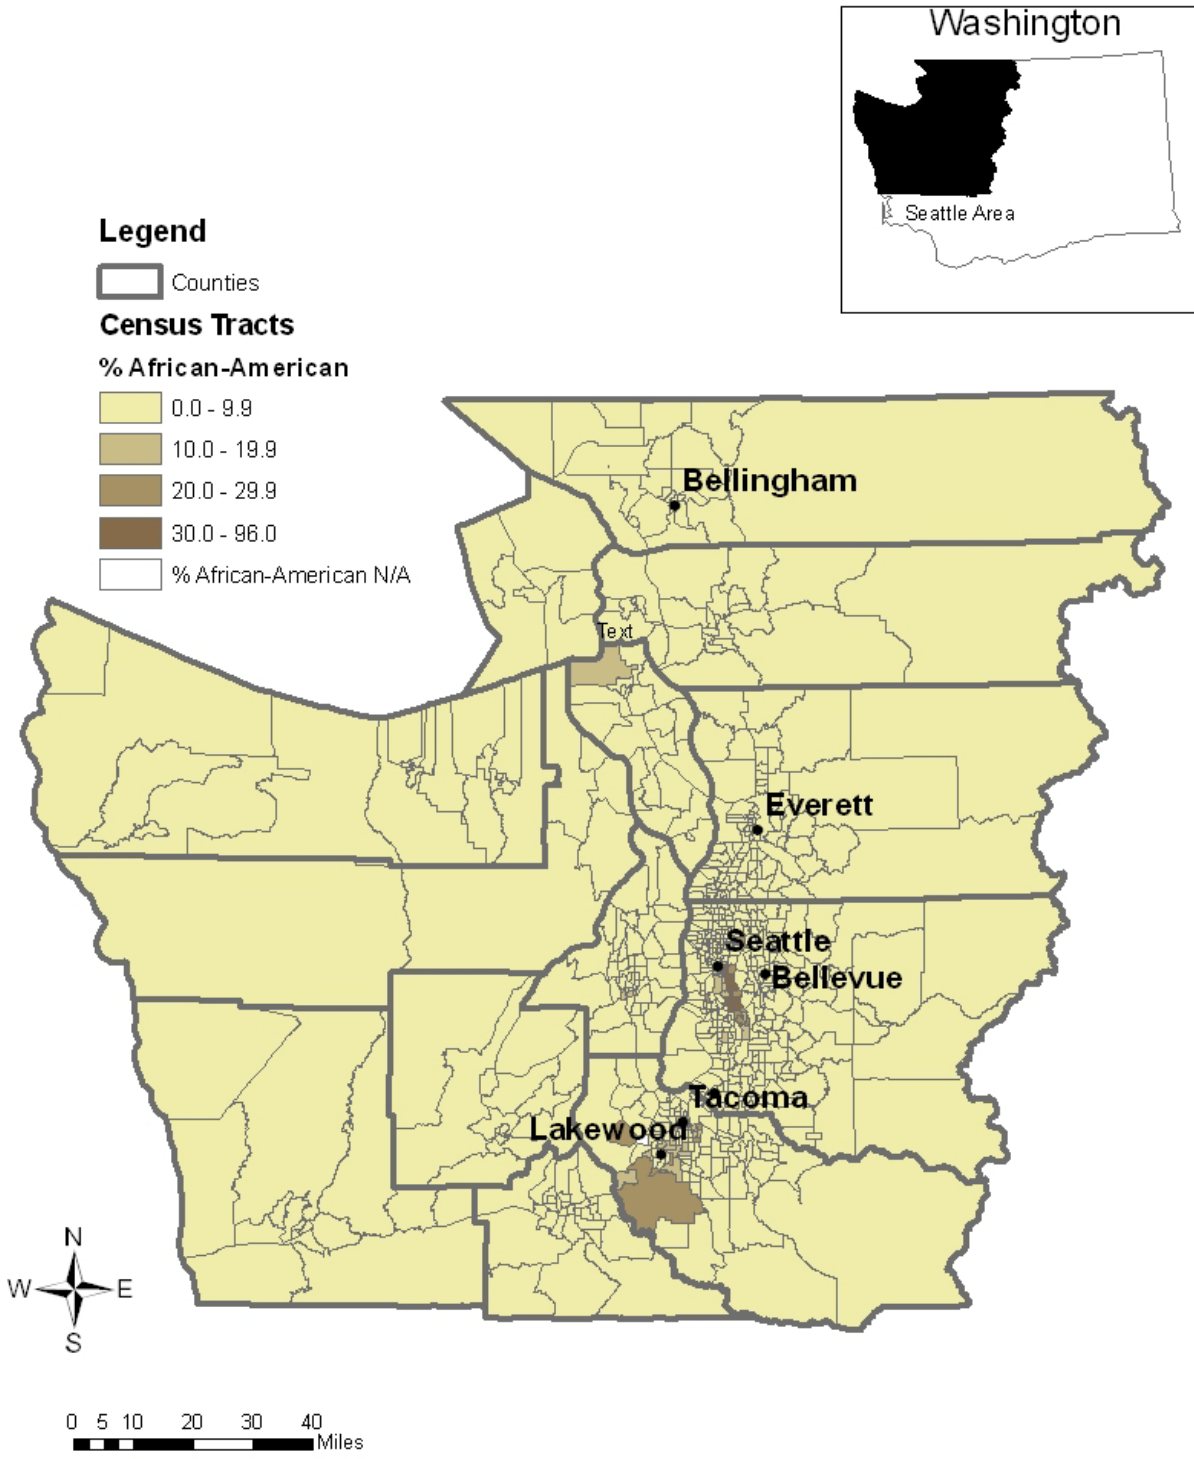

Supplement: kwn369_1.pdf [file kwn369_1.pdf]
